# Supplementary material for: Powerful detection of polygenic selection and evidence of environmental adaptation in US beef cattle
Source: PLoS Genet. 2021 Jul 22;17(7):e1009652. doi: 10.1371/journal.pgen.1009652 (PMC8297814; doi:10.1371/journal.pgen.1009652)
Supplement: S11 Table — C. elegans gene homologs were generated from Ortholist2, requiring that genes be present in at least three data sources to be included in enrichment analysis. For each breed’s gene list, we include a list of worm tissues with significant enrichment of listed genes (q-value < 0.1). (XLSX) [file pgen.1009652.s024.xlsx]

## Sheet: S21
Term	Expected	Observed	Enrichment Fold Change	P value	Q value	Dataset
RMDVR WBbt:0005029	0.35	5	14	1.3e-06	0.00037	RedAngus
RMDVL WBbt:0005031	0.36	5	14	1.5e-06	0.00037	RedAngus
SMD WBbt:0005353	0.55	5	9.1	1.8e-05	0.0018	RedAngus
RMED WBbt:0005027	0.35	4	11	2.5e-05	0.0018	RedAngus
linker cell WBbt:0005062	0.39	4	10	4.4e-05	0.0026	RedAngus
PDE WBbt:0006747	0.54	4	7.4	0.0002	0.0098	RedAngus
postdeirid sensillum WBbt:0005471	0.58	4	6.9	0.00029	0.012	RedAngus
AVB WBbt:0005841	0.34	3	8.8	0.00037	0.013	RedAngus
RMDL WBbt:0005037	0.36	3	8.3	0.00046	0.015	RedAngus
RMDR WBbt:0005033	0.36	3	8.3	0.00046	0.015	RedAngus
AWA WBbt:0005670	0.66	4	6	0.00054	0.015	RedAngus
AUA WBbt:0006817	0.38	3	7.8	0.00057	0.015	RedAngus
ALN WBbt:0006851	0.38	3	7.8	0.00057	0.015	RedAngus
AWB WBbt:0005671	0.96	4	4.2	0.0029	0.059	RedAngus
nerve ring WBbt:0006749	9.3	18	1.9	0.003	0.059	RedAngus
posterior lateral ganglion WBbt:0005465	2	6	3.1	0.0038	0.068	RedAngus
ASK WBbt:0005668	1.6	5	3.2	0.0052	0.089	RedAngus
AVD WBbt:0006818	3.2	8	2.5	0.0053	0.089	RedAngus
ALA WBbt:0003955	0.097	2	21	0.00013	0.037	Simmental
SDQL WBbt:0004993	0.11	2	17	0.00021	0.037	Simmental
posterior lateral ganglion WBbt:0005465	0.55	4	7.2	0.00026	0.037	Simmental
SDQR WBbt:0004991	0.12	2	16	0.00026	0.037	Simmental
SMD WBbt:0005353	0.16	2	13	0.00053	0.037	Simmental
HSN WBbt:0006830	0.38	3	7.8	0.00064	0.037	Simmental
vulA WBbt:0006762	0.17	2	12	0.00065	0.037	Simmental
vulB2 WBbt:0006764	0.17	2	12	0.00069	0.037	Simmental
vulB1 WBbt:0006763	0.17	2	12	0.00072	0.037	Simmental
vulC WBbt:0006765	0.19	2	11	0.00091	0.037	Simmental
vulE WBbt:0006767	0.19	2	11	0.00091	0.037	Simmental
vulF WBbt:0006768	0.2	2	10	0.0011	0.037	Simmental
vulD WBbt:0006766	0.21	2	9.3	0.0013	0.037	Simmental
AVB WBbt:0005841	0.097	1	10	0.0043	0.088	Simmental
RMDVR WBbt:0005029	0.1	1	10	0.0045	0.088	Simmental
RMED WBbt:0005027	0.1	1	10	0.0045	0.088	Simmental
Q cell WBbt:0008598	0.1	1	10	0.0045	0.088	Simmental
RMDL WBbt:0005037	0.1	1	9.7	0.0048	0.088	Simmental
RMDR WBbt:0005033	0.1	1	9.7	0.0048	0.088	Simmental
RMDVL WBbt:0005031	0.1	1	9.7	0.0048	0.088	Simmental
SIA WBbt:0005361	0.11	1	9.5	0.0051	0.088	Simmental
AUA WBbt:0006817	0.11	1	9.2	0.0053	0.088	Simmental
ALN WBbt:0006851	0.11	1	9.2	0.0053	0.088	Simmental
AWCL WBbt:0003827	0.36	2	5.5	0.0058	0.088	Simmental
AWCR WBbt:0003826	0.36	2	5.5	0.0058	0.088	Simmental
pm7 WBbt:0003721	0.12	1	8.5	0.0062	0.088	Simmental
